# Supplementary material for: A randomised controlled trial to clinically validate follitropin delta in its individualised dosing regimen for ovarian stimulation in Asian IVF/ICSI patients
Source: PubMed Central journal article supplement — Hum Reprod. 2021 Jun 28;36(9):2452–62. doi: 10.1093/humrep/deab155 (PMC8373472; doi:10.1093/humrep/deab155), 2021-06-28
Supplement: deab155_supplementary_table_s1.pdf [file deab155_supplementary_table_s1.pdf]

**Supplementary Table S1 Asian follitropin delta phase 3 trial (GRAPE) group participating sites and principal investigators.**

|                       | Site                                                                                                                       | Principal investigator                |
|-----------------------|----------------------------------------------------------------------------------------------------------------------------|---------------------------------------|
| <b>Mainland China</b> | Center for Reproductive Medicine, Department of Obstetrics and Gynecology, Peking University Third Hospital, Beijing       | Jie Qiao                              |
|                       | Beijing Obstetrics and Gynecology Hospital, Capital Medical University, Beijing                                            | Shuyu Wang                            |
|                       | Peking University First Hospital, Beijing                                                                                  | Yang Xu                               |
|                       | West China Second University Hospital, Sichuan University/West China Women's and Children's Hospital, Chengdu              | Yezhou Yang                           |
|                       | The Sixth Affiliated Hospital of Sun Yat-sen University, Guangzhou                                                         | Xiaoyan Liang                         |
|                       | The Third Affiliated Hospital of Guangzhou Medical University, Guangzhou                                                   | Jianqiao Liu                          |
|                       | Sun Yat-sen Memorial Hospital, Sun Yat-sen University, Guangzhou                                                           | Qingxue Zhang                         |
|                       | The First Affiliated Hospital of Anhui Medical University, Hefei                                                           | Zhaolian Wei                          |
|                       | Jiangsu Province Hospital, The First Affiliated Hospital with Nanjing Medical University, Nanjing                          | Wei Wang                              |
|                       | Shengjing Hospital of China Medical University, Shenyang                                                                   | Jichun Tan                            |
|                       | Peking University Shenzhen Hospital, Shenzhen                                                                              | Weiping Qian                          |
|                       | Tianjin Medical University General Hospital, Tianjin                                                                       | Xueru Song                            |
|                       | Tianjin Central Hospital of Gynaecology and Obstetrics, Tianjin                                                            | Yunshan Zhang                         |
|                       | Tongji Hospital, Tongji Medical College of HUST, Tongji Medical College Huazhong University of Science & Technology, Wuhan | Lei Jin                               |
|                       | Renmin Hospital of Wuhan University, Hubei General Hospital, Wuhan                                                         | Jing Yang                             |
|                       | The First Affiliated Hospital of Zhengzhou University, Zhengzhou                                                           | Yingpu Sun                            |
| <b>South Korea</b>    | Seoul National University Bundang Hospital, Seongnam-si                                                                    | Jung Ryeol Lee                        |
|                       | Samsung Medical Center, Seoul                                                                                              | Doo Seok Choi                         |
|                       | Seoul National University Hospital, Seoul                                                                                  | Seok Hyun Kim                         |
|                       | Asan Medical Center, Seoul                                                                                                 | Sung-Hoon Kim                         |
| <b>Taiwan</b>         | Taichung Veterans General Hospital, Taichung                                                                               | Ming-Jer Chen                         |
|                       | Taipei Medical University Hospital, Taipei                                                                                 | Chii-Ruey Tzeng                       |
|                       | National Taiwan University Hospital, Taipei                                                                                | Kuang-Han Chao                        |
|                       |                                                                                                                            | Yi-Xuan Lee (from mid-September 2019) |
|                       | Chang Gung Memorial Hospital, Taoyuan                                                                                      | Hong-Yuan Huang                       |
| <b>Vietnam</b>        | National Center for Assisted Reproductive Technology, Hanoi                                                                | Hung Ho                               |
|                       | My Duc Hospital, Ho Chi Minh City                                                                                          | Tuong Ho                              |
