# Supplementary material for: A randomised controlled trial to clinically validate follitropin delta in its individualised dosing regimen for ovarian stimulation in Asian IVF/ICSI patients
Source: PubMed Central journal article supplement — Hum Reprod. 2021 Jun 28;36(9):2452–62. doi: 10.1093/humrep/deab155 (PMC8373472; doi:10.1093/humrep/deab155), 2021-06-28
Supplement: deab155_supplementary_table_s3.pdf [file deab155_supplementary_table_s3.pdf]

**Supplementary Table SIII Individualised follitropin delta dosing regimen.**

| AMH (pmol/l)                                         | <15   | 15–16 | 17   | 18   | 19–20 | 21–22 | 23–24 | 25–27 | 28–32 | 33–39 | ≥40  |
|------------------------------------------------------|-------|-------|------|------|-------|-------|-------|-------|-------|-------|------|
| <b>Fixed daily dose of follitropin delta (µg/kg)</b> | 12 µg | 0.19  | 0.18 | 0.17 | 0.16  | 0.15  | 0.14  | 0.13  | 0.12  | 0.11  | 0.10 |

AMH concentration was rounded off to the nearest integer before determination of dose.

With the exception of 12 µg for AMH <15 pmol/l, all doses are expressed as µg/kg.

Minimum daily dose was 6 µg.

Maximum daily dose was 12 µg.

AMH, anti-Müllerian hormone.
