# Supplementary material for: A randomised controlled trial to clinically validate follitropin delta in its individualised dosing regimen for ovarian stimulation in Asian IVF/ICSI patients
Source: PubMed Central journal article supplement — Hum Reprod. 2021 Jun 28;36(9):2452–62. doi: 10.1093/humrep/deab155 (PMC8373472; doi:10.1093/humrep/deab155), 2021-06-28
Supplement: deab155_supplementary_table_s4.pdf [file deab155_supplementary_table_s4.pdf]

**Supplementary Table SIV Analytical assays for the hormones measured in serum.**

| Hormone      | Assay | Sensitivity (limit of detection) | Precision (coefficient of variation, %) |
|--------------|-------|----------------------------------|-----------------------------------------|
| AMH          | ECLIA | 0.07 pmol/l                      | ≤4.4 <sup>a</sup>                       |
| Estradiol    | CLIA  | 11.8 pg/ml (43.6 pmol/l)         | ≤13.3 <sup>b</sup>                      |
| Inhibin B    | ELISA | 2.91 pg/ml                       | ≤6.6 <sup>a</sup>                       |
| Inhibin A    | CLIA  | <1 pg/ml                         | ≤6.05 <sup>b</sup>                      |
| Progesterone | CLIA  | 0.1 ng/ml (0.32 nmol/l)          | ≤14.7 <sup>b</sup>                      |

AMH, anti-Müllerian hormone; CLIA, chemiluminescence immunoassay; ECLIA, electrochemiluminescence immunoassay.

<sup>a</sup>Inter-assay precision (intermediate precision).

<sup>b</sup>Total precision.
